# Supplementary material for: Evaluation of a Deep Learning Reconstruction for High-Quality T2-Weighted Breast Magnetic Resonance Imaging
Source: MDPI journal article supplement (doi:10.3390/tomography9050152), 2023-10-18
Supplement: s1 [file s1]

## Reader Study Rubric

Minor artifact-> the artifact does not affect areas of interest, the artifact is easily read through, the artifact has only limited effect.

Major artifact-> the artifact obscures the area of interest; the artifact greatly impacts the visualization of tissues.

Impact on Diagnostic Capability-> The reader feels that the content of a section (SNR, artifact, etc.) is impacting their ability to confidently view or identify areas of interest in the image.

**Table S1:** Rubric used by radiologist readers to score image quality.

| Score | SNR            | Artifacts                                                                   | Perceived Sharpness                                                                | Overall                                                                                  |
|-------|----------------|-----------------------------------------------------------------------------|------------------------------------------------------------------------------------|------------------------------------------------------------------------------------------|
| 5     | Excellent      | Excellent: no artifacts                                                     | Excellent: edges are sharp and distinct                                            | Excellent: no artifacts and anatomical detail well visualized                            |
| 4     | Good           | Good: minor artifacts, no impact on diagnostic capability                   | Good: edges seen clearly, slight blurriness, no impact on diagnostic capability    | Good: minor artifacts, some blurriness, no impact on diagnostic capability               |
| 3     | Fair           | Fair: major or multiple minor artifacts, no impact on diagnostic capability | Fair: some blurring, loss of anatomical detail, no impact on diagnostic capability | Fair: major or multiple minor artifacts, blurriness, no impact on diagnostic capability  |
| 2     | Poor           | Poor: multiple major or minor artifacts, impact on diagnostic capability    | Poor: blurring, loss of anatomical detail, impact on diagnostic capability         | Poor: multiple major or minor artifacts, loss of detail, impact on diagnostic capability |
| 1     | Non-diagnostic | Non-diagnostic: image is unreadable                                         | Non-diagnostic: features are blurred beyond recognition                            | Non-diagnostic: severe artifacts, and complete loss of anatomical detail                 |

**Table S2:** T2-weighted Image Preference by Reader.

| SOC Reader Preference |             |         |               |
|-----------------------|-------------|---------|---------------|
|                       | SOC, non-DL | SOC, DL | No Preference |
| Reader 1              | 1           | 18      | -             |
| Reader 2              | -           | 19      | -             |
| Reader 3              | 3           | 15      | 1             |
| Reader 4              | -           | 19      | -             |

  

| HR Reader Preference |             |            |        |
|----------------------|-------------|------------|--------|
|                      | SOC, non-DL | HR, non-DL | HR, DL |
| Reader 1             | 2           | 2          | 50     |
| Reader 2             | 23          | 31         | -      |

SOC: Standard of Care, HR: High Resolution, DL: Deep Learning.

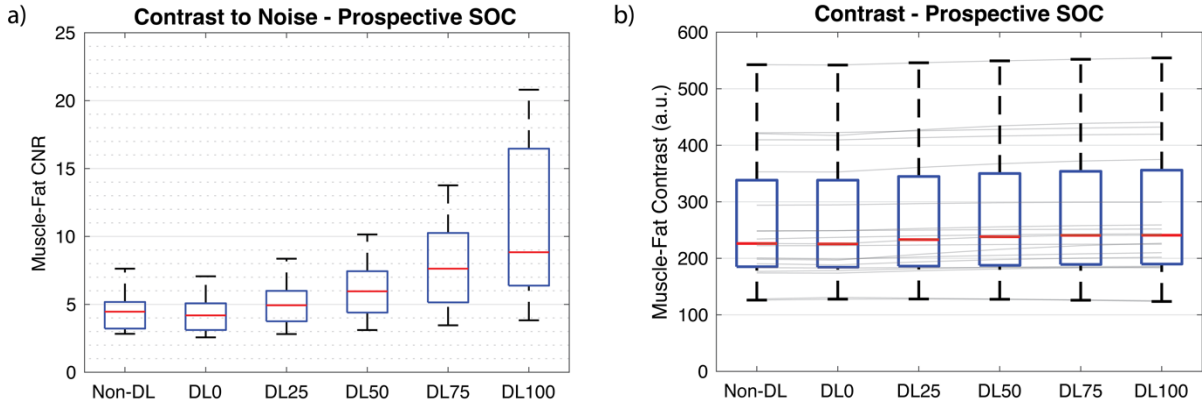

**Figure S1. a)** Muscle-fat contrast-to-noise ratio (CNR) increased when the deep learning reconstruction (DL) was applied with a noise reduction greater than 25% (DL25). Higher levels of denoising produced higher CNR. Use of DL without denoising (DL0) slightly reduced the CNR. Box plots show the distributions of CNR measurements for 19 retrospectively collected standard-of-care (SOC) T2w breast exams. The red horizontal line represents the median value. An outlier point existed for DL100 at a CNR of 46, however it was cropped to preserve the readability of the plot. **b)** Muscle-fat contrast (rather than contrast to noise) shows the contrast remains consistent across all images regardless of DL. The thin faint horizontal lines represent the 19 individual exams and show that contrast for each exam was constant across all reconstructions.
